# Supplementary material for: Bottom-up synthesis of finite models of helical (n,m)-single-wall carbon nanotubes
Source: Springer Nature journal article supplement (doi:10.1038/ncomms1505), 2011-10-11
Supplement: 41467_2011_BFncomms1505_MOESM5_ESM.mol [file 41467_2011_BFncomms1505_MOESM5_ESM.mol]

  ChemDraw09271105232D

120136  0  0  0  0  0  0  0  0999 V2000
   -2.5849    3.9771    0.0000 C   0  0  0  0  0  0  0  0  0  0  0  0
   -2.3158    3.3892    0.0000 C   0  0  0  0  0  0  0  0  0  0  0  0
   -2.7955    3.4844    0.0000 C   0  0  0  0  0  0  0  0  0  0  0  0
   -1.6270    4.3270    0.0000 C   0  0  0  0  0  0  0  0  0  0  0  0
   -1.4537    3.7041    0.0000 C   0  0  0  0  0  0  0  0  0  0  0  0
   -1.1483    4.0861    0.0000 C   0  0  0  0  0  0  0  0  0  0  0  0
    1.1984    4.2573    0.0000 C   0  0  0  0  0  0  0  0  0  0  0  0
    1.0190    3.6362    0.0000 C   0  0  0  0  0  0  0  0  0  0  0  0
    1.4794    3.8010    0.0000 C   0  0  0  0  0  0  0  0  0  0  0  0
    0.1995    4.4623    0.0000 C   0  0  0  0  0  0  0  0  0  0  0  0
    0.1199    3.8207    0.0000 C   0  0  0  0  0  0  0  0  0  0  0  0
   -0.2385    4.1534    0.0000 C   0  0  0  0  0  0  0  0  0  0  0  0
   -1.2449    4.7226    0.0000 C   0  0  0  0  0  0  0  0  0  0  0  0
   -0.2279    4.7979    0.0000 C   0  0  0  0  0  0  0  0  0  0  0  0
    1.7074    4.4281    0.0000 C   0  0  0  0  0  0  0  0  0  0  0  0
    2.6220    3.9770    0.0000 C   0  0  0  0  0  0  0  0  0  0  0  0
    2.2912    3.4215    0.0000 C   0  0  0  0  0  0  0  0  0  0  0  0
    2.7783    3.4644    0.0000 C   0  0  0  0  0  0  0  0  0  0  0  0
   -1.8887    5.3950    0.0000 C   0  0  0  0  0  0  0  0  0  0  0  0
    1.5156    2.9765    0.0000 C   0  0  0  0  0  0  0  0  0  0  0  0
   -4.0200    2.5420    0.0000 C   0  0  0  0  0  0  0  0  0  0  0  0
   -3.4321    2.2729    0.0000 C   0  0  0  0  0  0  0  0  0  0  0  0
   -3.5273    2.7526    0.0000 C   0  0  0  0  0  0  0  0  0  0  0  0
   -4.3699    1.5841    0.0000 C   0  0  0  0  0  0  0  0  0  0  0  0
   -3.7470    1.4108    0.0000 C   0  0  0  0  0  0  0  0  0  0  0  0
   -4.1290    1.1054    0.0000 C   0  0  0  0  0  0  0  0  0  0  0  0
   -4.3002   -1.2413    0.0000 C   0  0  0  0  0  0  0  0  0  0  0  0
   -3.6791   -1.0619    0.0000 C   0  0  0  0  0  0  0  0  0  0  0  0
   -3.8439   -1.5223    0.0000 C   0  0  0  0  0  0  0  0  0  0  0  0
   -4.5052   -0.2424    0.0000 C   0  0  0  0  0  0  0  0  0  0  0  0
   -3.8636   -0.1628    0.0000 C   0  0  0  0  0  0  0  0  0  0  0  0
   -4.1963    0.1956    0.0000 C   0  0  0  0  0  0  0  0  0  0  0  0
   -4.7655    1.2020    0.0000 C   0  0  0  0  0  0  0  0  0  0  0  0
   -4.8408    0.1850    0.0000 C   0  0  0  0  0  0  0  0  0  0  0  0
   -4.4710   -1.7503    0.0000 C   0  0  0  0  0  0  0  0  0  0  0  0
   -4.0199   -2.6649    0.0000 C   0  0  0  0  0  0  0  0  0  0  0  0
   -3.4644   -2.3341    0.0000 C   0  0  0  0  0  0  0  0  0  0  0  0
   -3.5073   -2.8212    0.0000 C   0  0  0  0  0  0  0  0  0  0  0  0
   -5.4379    1.8458    0.0000 C   0  0  0  0  0  0  0  0  0  0  0  0
   -3.0194   -1.5585    0.0000 C   0  0  0  0  0  0  0  0  0  0  0  0
    2.5890   -3.9785    0.0000 C   0  0  0  0  0  0  0  0  0  0  0  0
    2.3200   -3.3906    0.0000 C   0  0  0  0  0  0  0  0  0  0  0  0
    2.7997   -3.4858    0.0000 C   0  0  0  0  0  0  0  0  0  0  0  0
    1.6311   -4.3284    0.0000 C   0  0  0  0  0  0  0  0  0  0  0  0
    1.4579   -3.7055    0.0000 C   0  0  0  0  0  0  0  0  0  0  0  0
    1.1524   -4.0875    0.0000 C   0  0  0  0  0  0  0  0  0  0  0  0
   -1.1943   -4.2587    0.0000 C   0  0  0  0  0  0  0  0  0  0  0  0
   -1.0148   -3.6376    0.0000 C   0  0  0  0  0  0  0  0  0  0  0  0
   -1.4753   -3.8024    0.0000 C   0  0  0  0  0  0  0  0  0  0  0  0
   -0.1953   -4.4637    0.0000 C   0  0  0  0  0  0  0  0  0  0  0  0
   -0.1158   -3.8221    0.0000 C   0  0  0  0  0  0  0  0  0  0  0  0
    0.2426   -4.1548    0.0000 C   0  0  0  0  0  0  0  0  0  0  0  0
    1.2490   -4.7240    0.0000 C   0  0  0  0  0  0  0  0  0  0  0  0
    0.2320   -4.7993    0.0000 C   0  0  0  0  0  0  0  0  0  0  0  0
   -1.7033   -4.4294    0.0000 C   0  0  0  0  0  0  0  0  0  0  0  0
   -2.6179   -3.9784    0.0000 C   0  0  0  0  0  0  0  0  0  0  0  0
   -2.2870   -3.4229    0.0000 C   0  0  0  0  0  0  0  0  0  0  0  0
   -2.7742   -3.4658    0.0000 C   0  0  0  0  0  0  0  0  0  0  0  0
    1.8928   -5.3963    0.0000 C   0  0  0  0  0  0  0  0  0  0  0  0
   -1.5115   -2.9779    0.0000 C   0  0  0  0  0  0  0  0  0  0  0  0
    4.0242   -2.5433    0.0000 C   0  0  0  0  0  0  0  0  0  0  0  0
    3.4363   -2.2743    0.0000 C   0  0  0  0  0  0  0  0  0  0  0  0
    3.5314   -2.7540    0.0000 C   0  0  0  0  0  0  0  0  0  0  0  0
    4.3741   -1.5855    0.0000 C   0  0  0  0  0  0  0  0  0  0  0  0
    3.7512   -1.4122    0.0000 C   0  0  0  0  0  0  0  0  0  0  0  0
    4.1331   -1.1068    0.0000 C   0  0  0  0  0  0  0  0  0  0  0  0
    4.3044    1.2400    0.0000 C   0  0  0  0  0  0  0  0  0  0  0  0
    3.6832    1.0605    0.0000 C   0  0  0  0  0  0  0  0  0  0  0  0
    3.8480    1.5209    0.0000 C   0  0  0  0  0  0  0  0  0  0  0  0
    4.5093    0.2410    0.0000 C   0  0  0  0  0  0  0  0  0  0  0  0
    3.8677    0.1614    0.0000 C   0  0  0  0  0  0  0  0  0  0  0  0
    4.2005   -0.1970    0.0000 C   0  0  0  0  0  0  0  0  0  0  0  0
    4.7696   -1.2034    0.0000 C   0  0  0  0  0  0  0  0  0  0  0  0
    4.8449   -0.1864    0.0000 C   0  0  0  0  0  0  0  0  0  0  0  0
    4.4751    1.7489    0.0000 C   0  0  0  0  0  0  0  0  0  0  0  0
    4.0240    2.6635    0.0000 C   0  0  0  0  0  0  0  0  0  0  0  0
    3.4685    2.3327    0.0000 C   0  0  0  0  0  0  0  0  0  0  0  0
    3.5114    2.8199    0.0000 C   0  0  0  0  0  0  0  0  0  0  0  0
    5.4420   -1.8472    0.0000 C   0  0  0  0  0  0  0  0  0  0  0  0
    3.0236    1.5572    0.0000 C   0  0  0  0  0  0  0  0  0  0  0  0
   -2.7921    5.1738    0.0000 C   0  0  0  0  0  0  0  0  0  0  0  0
   -3.4353    5.8455    0.0000 C   0  0  0  0  0  0  0  0  0  0  0  0
   -4.3368    5.6248    0.0000 C   0  0  0  0  0  0  0  0  0  0  0  0
   -4.5959    4.7356    0.0000 C   0  0  0  0  0  0  0  0  0  0  0  0
   -3.9566    4.0680    0.0000 C   0  0  0  0  0  0  0  0  0  0  0  0
   -6.3308    1.5857    0.0000 C   0  0  0  0  0  0  0  0  0  0  0  0
   -7.0025    2.2289    0.0000 C   0  0  0  0  0  0  0  0  0  0  0  0
   -7.8954    1.9688    0.0000 C   0  0  0  0  0  0  0  0  0  0  0  0
   -8.1166    1.0654    0.0000 C   0  0  0  0  0  0  0  0  0  0  0  0
   -7.4449    0.4222    0.0000 C   0  0  0  0  0  0  0  0  0  0  0  0
   -2.2601   -1.2359    0.0000 C   0  0  0  0  0  0  0  0  0  0  0  0
   -2.1602   -0.4189    0.0000 C   0  0  0  0  0  0  0  0  0  0  0  0
   -1.4026   -0.0970    0.0000 C   0  0  0  0  0  0  0  0  0  0  0  0
   -1.3029    0.7181    0.0000 C   0  0  0  0  0  0  0  0  0  0  0  0
   -1.9589    1.2121    0.0000 C   0  0  0  0  0  0  0  0  0  0  0  0
    1.1930    2.2172    0.0000 C   0  0  0  0  0  0  0  0  0  0  0  0
    0.3760    2.1173    0.0000 C   0  0  0  0  0  0  0  0  0  0  0  0
    0.0548    1.3615    0.0000 C   0  0  0  0  0  0  0  0  0  0  0  0
   -0.7584    1.2620    0.0000 C   0  0  0  0  0  0  0  0  0  0  0  0
   -1.2512    1.9165    0.0000 C   0  0  0  0  0  0  0  0  0  0  0  0
    2.2643    1.2345    0.0000 C   0  0  0  0  0  0  0  0  0  0  0  0
    2.1643    0.4175    0.0000 C   0  0  0  0  0  0  0  0  0  0  0  0
    1.4068    0.0956    0.0000 C   0  0  0  0  0  0  0  0  0  0  0  0
    1.3068   -0.7214    0.0000 C   0  0  0  0  0  0  0  0  0  0  0  0
    1.9628   -1.2153    0.0000 C   0  0  0  0  0  0  0  0  0  0  0  0
    6.3349   -1.5871    0.0000 C   0  0  0  0  0  0  0  0  0  0  0  0
    7.0053   -2.2290    0.0000 C   0  0  0  0  0  0  0  0  0  0  0  0
    7.8963   -1.9694    0.0000 C   0  0  0  0  0  0  0  0  0  0  0  0
    8.1166   -1.0697    0.0000 C   0  0  0  0  0  0  0  0  0  0  0  0
    7.4490   -0.4305    0.0000 C   0  0  0  0  0  0  0  0  0  0  0  0
    2.7962   -5.1752    0.0000 C   0  0  0  0  0  0  0  0  0  0  0  0
    3.4381   -5.8455    0.0000 C   0  0  0  0  0  0  0  0  0  0  0  0
    4.3377   -5.6253    0.0000 C   0  0  0  0  0  0  0  0  0  0  0  0
    4.5963   -4.7379    0.0000 C   0  0  0  0  0  0  0  0  0  0  0  0
    3.9583   -4.0716    0.0000 C   0  0  0  0  0  0  0  0  0  0  0  0
   -1.1889   -2.2186    0.0000 C   0  0  0  0  0  0  0  0  0  0  0  0
   -0.3719   -2.1187    0.0000 C   0  0  0  0  0  0  0  0  0  0  0  0
   -0.0507   -1.3629    0.0000 C   0  0  0  0  0  0  0  0  0  0  0  0
    0.7625   -1.2634    0.0000 C   0  0  0  0  0  0  0  0  0  0  0  0
    1.2541   -1.9164    0.0000 C   0  0  0  0  0  0  0  0  0  0  0  0
  1  4  1  0      
  1  3  2  0      
  2  3  1  0      
  4  6  2  0      
  5  6  1  0      
  2  5  2  0      
  7 10  1  0      
  7  9  2  0      
  8  9  1  0      
 10 12  2  0      
 11 12  1  0      
  8 11  2  0      
  6 12  1  0      
 13 14  2  0      
  4 13  1  0      
 10 14  1  0      
 15 16  2  0      
 16 18  1  0      
 17 18  2  0      
  7 15  1  0      
  9 17  1  0      
 13 19  1  0      
  8 20  1  0      
 21 24  1  0      
 21 23  2  0      
 22 23  1  0      
 24 26  2  0      
 25 26  1  0      
 22 25  2  0      
 27 30  1  0      
 27 29  2  0      
 28 29  1  0      
 30 32  2  0      
 31 32  1  0      
 28 31  2  0      
 26 32  1  0      
 33 34  2  0      
 24 33  1  0      
 30 34  1  0      
 35 36  2  0      
 36 38  1  0      
 37 38  2  0      
 27 35  1  0      
 29 37  1  0      
 33 39  1  0      
 28 40  1  0      
 41 44  1  0      
 41 43  2  0      
 42 43  1  0      
 44 46  2  0      
 45 46  1  0      
 42 45  2  0      
 47 50  1  0      
 47 49  2  0      
 48 49  1  0      
 50 52  2  0      
 51 52  1  0      
 48 51  2  0      
 46 52  1  0      
 53 54  2  0      
 44 53  1  0      
 50 54  1  0      
 55 56  2  0      
 56 58  1  0      
 57 58  2  0      
 47 55  1  0      
 49 57  1  0      
 53 59  1  0      
 48 60  1  0      
 61 64  1  0      
 61 63  2  0      
 62 63  1  0      
 64 66  2  0      
 65 66  1  0      
 62 65  2  0      
 67 70  1  0      
 67 69  2  0      
 68 69  1  0      
 70 72  2  0      
 71 72  1  0      
 68 71  2  0      
 66 72  1  0      
 73 74  2  0      
 64 73  1  0      
 70 74  1  0      
 75 76  2  0      
 76 78  1  0      
 77 78  2  0      
 67 75  1  0      
 69 77  1  0      
 73 79  1  0      
 68 80  1  0      
 23  3  1  0      
 18 78  1  0      
 58 38  1  0      
 43 63  1  0      
 19 81  1  0      
 81 82  1  0      
 82 83  1  0      
 83 84  1  0      
 84 85  1  0      
 39 86  1  0      
 86 87  1  0      
 87 88  1  0      
 88 89  1  0      
 89 90  1  0      
 40 91  1  0      
 91 92  1  0      
 92 93  1  0      
 93 94  1  0      
 94 95  1  0      
 20 96  1  0      
 96 97  1  0      
 97 98  1  0      
 98 99  1  0      
 99100  1  0      
 80101  1  0      
101102  1  0      
102103  1  0      
103104  1  0      
104105  1  0      
 79106  1  0      
106107  1  0      
107108  1  0      
108109  1  0      
109110  1  0      
 59111  1  0      
111112  1  0      
112113  1  0      
113114  1  0      
114115  1  0      
 60116  1  0      
116117  1  0      
117118  1  0      
118119  1  0      
119120  1  0      
M  END
